# Supplementary material for: Altered Toll-like receptor expression and function in HPV-associated oropharyngeal carcinoma
Source: PubMed Central journal article supplement (PMC5787461; doi:10.18632/oncotarget.18959), 2017-07-04
Supplement: oncotarget-09-236-s001.pdf [file oncotarget-09-236-s001.pdf]

## Altered Toll-like receptor expression and function in HPV-associated oropharyngeal carcinoma

### SUPPLEMENTARY MATERIALS

**Supplementary Table 1: Cell lines used in this study**

| Cell line  | TNM  | Site           | Sex       | HPV   |
|------------|------|----------------|-----------|-------|
| UD-SCC2    | T1N2 | Hypopharynx    | Male      | HPV16 |
| UPCI-SCC90 | T2N1 | Base of tongue | Male      | HPV16 |
| UPCI-SCC72 | T3N2 | Tonsil         | Female    | HPV-  |
| SCC89      | T4N2 | Tonsil         | Male      | HPV-  |
| HELA       |      | Uterine Cervix | Female    | HPV18 |
| THP1       | N/A  | Monocyte       | Not known | HPV-  |

**Supplementary Table 2: List of sequences of forward and reverse primers**

| Gene         | Foward 5'-3'             | Reverse 5'-3'           | Product size | Genbank                        |
|--------------|--------------------------|-------------------------|--------------|--------------------------------|
| <i>TLR1</i>  | CTGTGAACCTCAAGCACTTGG    | GAGCAATTGGCAGCACACTA    | 144          | <a href="#">NM_003263.3</a>    |
| <i>TLR2</i>  | TAACAGGCTGCATTCCCAAGA    | TAGTAACATGGGTAAGAGGGAGG | 155          | <a href="#">NM_001318796.1</a> |
| <i>TLR3</i>  | GTGGATAGCTCTCCTCACCA     | CAGAGCCGTGCTAAGTTGTTA   | 155          | <a href="#">NM_003265.2</a>    |
| <i>TLR4</i>  | AGTTTCCTGCAATGGATCAAGG   | CTGCTTATCTGAAGGTGTTGCAC | 84           | <a href="#">NM_138554.4</a>    |
| <i>TLR5</i>  | GATTCTTGCCACCACATCAT     | CAGGTGTCTCACTGAACTTCTG  | 106          | <a href="#">NM_003268.5</a>    |
| <i>TLR6</i>  | GATATCCTGCCATCCTATTGTGAG | CAGCTTCATAGCACTCAATCCC  | 133          | <a href="#">NM_006068.4</a>    |
| <i>TLR7</i>  | TGGAAATTGCCCTCGTTGTT     | GTCAGCGCATCAAAAAGCATT   | 99           | <a href="#">NM_016562.3</a>    |
| <i>TLR8</i>  | CAGCCTGGGAAAGGAGACTA     | TCTTCGGCGCATAACTCACA    | 105          | <a href="#">NM_016610.3</a>    |
| <i>TLR9</i>  | AGTCAATGGCTCCCAGTTCCT    | CGTGAATGAGTGCTCGTGGTA   | 94           | <a href="#">NM_017442.3</a>    |
| <i>TLR10</i> | TCCAGAATGAGTGGTGCCAT     | CCTTGGGCCATTCCAAGTATG   | 177          | <a href="#">NM_030956.3</a>    |
| <i>IL-6</i>  | AATAAAACAACCTGAACCTTCCA  | TTATTGATTTTACCAGGCAAGT  | 94           | <a href="#">NM_001318095.1</a> |
| <i>IL-8</i>  | TGTGTGAAATTATTGTAAAGCTT  | TAAATCTTCTCCACAACCCTCTG | 91           | <a href="#">NM_000584.3</a>    |
| <i>U6</i>    | CTCGCTTCGGCAGCACA        | AACGCTTCACGAATTTGCGT    | 96           | <a href="#">NM_020810.3</a>    |

**Supplementary Table 3: HPV-positive tumor species data**

|    | Sex | Age at the diagnosis | Race  | Site            | TNM     | Smoke (Years of use) | Drink | Recurrence | Metastasis | Survival (Months) |
|----|-----|----------------------|-------|-----------------|---------|----------------------|-------|------------|------------|-------------------|
| 1  | M   | 50                   | White | Left Tonsil     | T2N0    | N                    | N     | N          | N          | 59                |
| 2  | M   | 58                   | White | Left tonsil     | T2N2b   | N                    | N     | N          | N          | 30                |
| 3  | M   | 66                   | White | Left tonsil     | T2N2aM0 | N                    | N     | N          | N          | 37                |
| 4  | M   | 66                   | White | Right tonsil    | T4aN1   | N                    | N     | N          | N          | 55                |
| 5  | M   | 45                   | White | Oropharynx      | TxN2b   | N                    | N     | N          | N          | 24                |
| 6  | M   | 65                   | White | Right Tonsil    | T3N2b   | N                    | N/I   | N          | N          | 3                 |
| 7  | M   | 55                   | White | Left tonsil     | T3N3    | Former (5)           | N     | N          | N          | 23                |
| 8  | F   | 52                   | White | Based of tongue | T1N2c   | Former (3)           | N     | N          | N          | 32                |
| 9  | M   | 61                   | White | Left Tonsil     | T4bN2b  | Former (11)          | N     | N          | N          | 9                 |
| 10 | M   | 67                   | White | Right tonsil    | T2N2b   | Y (30)               | Y     | N          | N          | 70                |
| 11 | M   | 70                   | White | Tonsil          | T2N2bM0 | Former (25)          | N     | N          | N          | 7                 |
| 12 | M   | 58                   | White | Left tonsil     | T1N1    | Former               | N     | N          | N          | 65                |
| 13 | M   | 54                   | Black | Right Tonsil    | T4N2b   | Former (45)          | N     | N          | N          | 63                |
| 14 | M   | 81                   | White | Left tonsil     | T2N0    | Former (30)          | N     | N          | N          | 23                |
| 15 | M   | 70                   | N/i   | Right Tonsil    | T2N2b   | Y                    | N     | N          | N          | Deceased *        |
| 16 | M   | 53                   | White | Left tonsil     | T3N2bM0 | N                    | N     | N          | N          | 65                |
| 17 | M   | 74                   | White | Right tonsil    | T3N2b   | Y                    | Y     | N          | N          | Deceased *        |
| 18 | F   | 42                   | White | Left tonsil     | T4N2    | Y                    | Y     | N          | N          | N/I               |
| 19 | M   | 67                   | Black | Right tonsil    | T2N0    | N                    | N     | N/I        | N/I        | Deceased          |
| 20 | M   | 47                   | White | Neck            | N/I     | Former               | N     | N          | N          | 41                |
| 21 | M   | 45                   | White | Right Tonsil    | T2N0    | N                    | N     | N          | N          | 52                |
| 22 | M   | 72                   | White | Right Tonsil    | T2N2b   | Former (30)          | N     | N          | N          | 39                |
| 23 | M   | 55                   | White | Right Tonsil    | T2N2a   | Y (5)                | N     | N          | N          | 5                 |
| 24 | F   | 66                   | White | Left tonsil     | T1aNx   | Former               | N     | N          | N          | 29                |
| 25 | M   | 65                   | White | Left Tonsil     | T2Nx    | Y (40)               | N     | N          | N          | 33                |
| 26 | M   | 53                   | White | Left Tonsil     | T1N1    | Former               | N     | N          | N          | 33                |
| 27 | F   | 91                   | White | Based of tongue | T1Nx    | N                    | N     | N          | N          | N/I               |
| 28 | M   | 63                   | White | Based of tongue | N/I     | N                    | N     | N          | N          | N/I               |
| 29 | M   | 66                   | White | Based of tongue | T2N0    | N                    | N     | N          | N          | 18                |
| 30 | M   | 54                   | White | Neck            | T1N2    | N                    | N     | N          | N          | 22                |
| 31 | M   | 65                   | White | Based of tongue | T3N2cM0 | Former (50)          | N     | N          | N          | 26                |

M = Male; F = Female; N/I = not informed; Y = Yes; N = No; \*Unknown cause, Survival in months since diagnosis.

**Supplementary Table 4: HPV-negative tumor species data**

|    | Sex | Age at the diagnosis | Race  | Site           | TNM     | Smoke (Years of use) | Drink | Recurrence | Metastasis | Survival (Months) |
|----|-----|----------------------|-------|----------------|---------|----------------------|-------|------------|------------|-------------------|
| 1  | F   | 62                   | White | Floor of mouth | T1N1    | Y (40)               | Y     | N          | N          | N/I               |
| 2  | F   | 52                   | White | Tongue         | T2N2c   | Y (30)               | Y     | N          | N          | 60                |
| 3  | M   | 68                   | White | Tongue         | T3N1    | Y (50)               | Y     | Y          | N          | Deceased          |
| 4  | M   | 71                   | Black | Larynx         | T4aN2b  | Y (40)               | N/I   | Y          | N          | Deceased          |
| 5  | M   | 68                   | White | Tongue         | T3Nx    | Y (42)               | Y     | N          | N          | N/I               |
| 6  | M   | 69                   | White | Pharynx        | T1Nx    | Y (60)               | N/I   | Y          | N          | 55                |
| 7  | M   | 63                   | White | Pharynx        | T4aN1M1 | Y (40)               | N     | N          | N          | N/I               |
| 8  | M   | 53                   | White | Soft palate    | T2N2bM0 | Former               | Y     | N          | Neck       | N/I               |
| 9  | F   | 62                   | White | Tongue         | T2N1    | Y (20)               | N/I   | Y          | N          | N/I               |
| 10 | M   | 58                   | N/I   | Hypopharynx    | T2Nx    | Y                    | Y     | Y          | N          | 59                |
| 11 | F   | 59                   | White | Tongue         | T2N0Mx  | N                    | N     | N          | N          | 59                |
| 12 | M   | 70                   | White | Larynx         | T4N0    | Former (15)          | Y     | N          | N          | Deceased          |
| 13 | F   | 65                   | N/I   | Tongue         | T2N1    | N                    | N     | N          | N          | N/I               |
| 14 | M   | 62                   | White | Tongue         | T2N0    | Former (4)           | N     | N          | N          | 48                |
| 15 | F   | 62                   | White | Palate         | T4aN0   | Former (30)          | Y     | Y          | Lung       | N/I               |
| 16 | M   | 26                   | White | Tongue         | T2N2b   | Y (15)               | N     | N          | N          | 60                |
| 17 | M   | 54                   | White | Right cheek    | T2N2b   | Former (15)          | N     | N          | N          | 69                |
| 18 | M   | 53                   | White | Tongue         | T4N0    | Y (37)               | Y     | Y          | N          | N/I               |
| 19 | M   | 57                   | White | Tongue         | T2N0    | Y (38)               | Y     | N          | N          | 46                |
| 20 | M   | 70                   | Black | Tongue         | T4aN2b  | Y                    | Y     | Y          | Lung       | Deceased          |
| 21 | M   | 53                   | White | Palate         | T3N0    | Former (20)          | N     | N          | N          | 45                |
| 22 | M   | 75                   | White | Tongue         | T2N2b   | N                    | N     | N          | Bone       | Deceased          |
| 23 | F   | 80                   | White | Tongue         | T2N2    | Former               | N     | Y          | N          | Deceased          |
| 24 | M   | 69                   | White | Floor of mouth | T2N0    | Former (40)          | N     | Y          | N          | 47                |
| 25 | M   | 49                   | White | Tongue         | T4a Nx  | Y (42)               | N     | Y          | Neck       | N/I               |
| 26 | F   | 74                   | White | Tongue         | T2N2b   | N                    | Y     | N          | N          | N/I               |
| 27 | M   | 56                   | White | Larynx         | T2N2    | Y (40)               | Y     | Y          | Lung       | N/I               |
| 28 | F   | 65                   | White | Buccal         | T1N0    | Former (40)          | Y     | Y          | N          | 1                 |
| 29 | M   | 72                   | White | Larynx         | T3N0    | Former (45)          | N     | N          | N          | 7                 |
| 30 | M   | 58                   | White | Tongue         | T1N1    | Former               | N     | N          | Neck       | 20                |

M = Male; F = Female; N/I = not informed; Y = Yes; N = No; Survival in months since diagnosis.

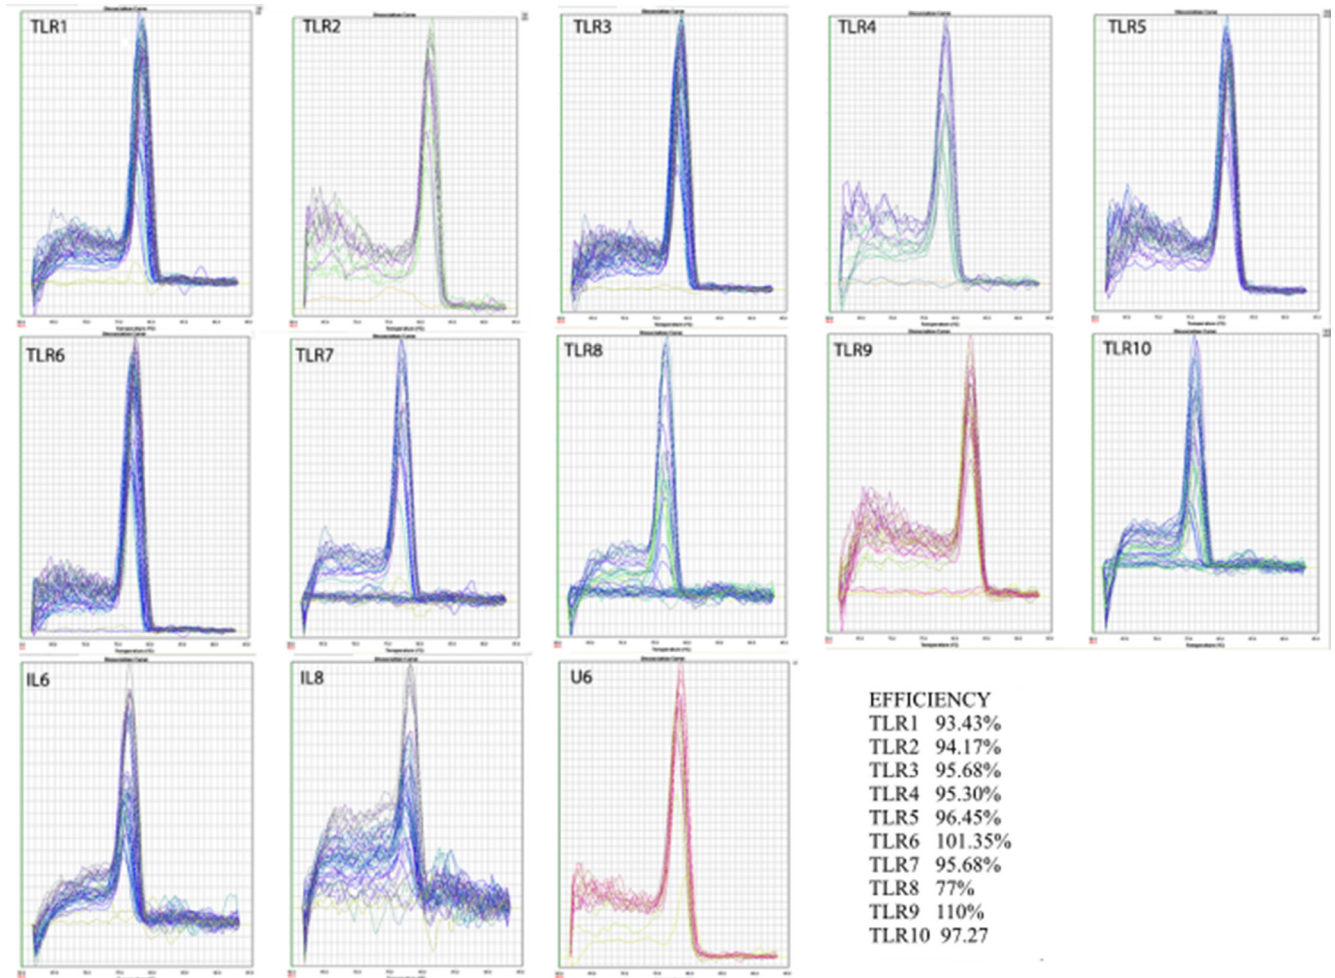

Supplementary Figure 1: Melting curve.

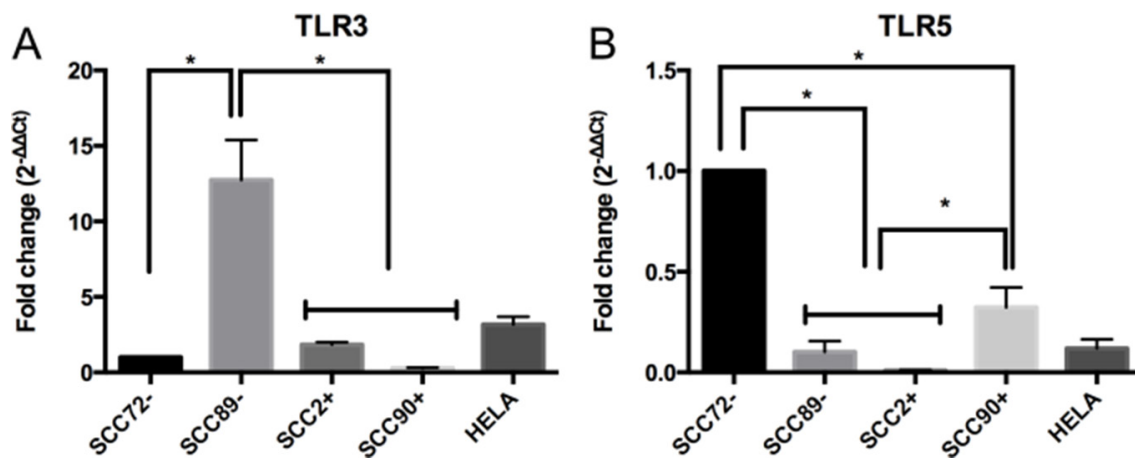

Supplementary Figure 2: (A) TLR3 was significant higher expressed in SCC89 (HPV-) compared to the other cell lines (normalized to U6). (B) TLR5 was significant lower in SCC89 (HPV-), SCC2 (HPV+) and SCC90 (HPV+) compared to SCC72 (HPV-), and SCC90 was significant higher than SCC89 and SCC2 (normalized to U6). (\**p* < 0.0001; mean ± SEM).
